# Supplementary material for: Shear-controlled composite cathodes for all-solid-state batteries combined synergistically with stereology-driven image analysis
Source: Royal Society of Chemistry journal article supplement (doi:10.1039/d4ta01804d), 2024-01-01
Supplement: d4ta01804d1.pdf [file d4ta01804d1.pdf]

Supplementary Information for

Shear-Controlled Composite Cathodes for All-Solid-State Batteries Combined Synergistically with Stereology-Driven Image Analysis

Hyeseong Jeong,<sup>ab</sup> Heesu Hwang,<sup>c</sup> Jeong-Won Cho,<sup>c</sup> Dongwook Shin,<sup>b</sup> Jong-Ho Lee,<sup>a</sup> Sung Soo Shin,<sup>\*d</sup> Jin-Ha Hwang,<sup>\*c</sup> and Hyoungchul Kim<sup>\*e</sup>

<sup>a</sup>*Energy Materials Research Center, Korea Institute of Science and Technology, 5 Hwarang-ro 14-gil, Seongbuk-gu, Seoul 02792, Republic of Korea*

<sup>b</sup>*Division of Materials Science and Engineering, Hanyang University, 222 Wangsimni-ro, Seongdong-gu, Seoul 04763, Republic of Korea*

<sup>c</sup>*Department of Materials Science and Engineering, Hongik University, 94 Wausan-ro, Mapo-gu, Seoul 04066, Republic of Korea*

<sup>d</sup>*Department of Mechanical Engineering, Incheon National University, 199 Academy-ro, Yeonsu-gu, Incheon 22012, Republic of Korea*

<sup>e</sup>*Department of Mechanical and System Design Engineering, Hongik University, 94 Wausan-ro, Mapo-gu, Seoul 04066, Republic of Korea*

\*Corresponding authors. E-mail address: ssshin@inu.ac.kr (S.S. Shin), jhwang@hongik.ac.kr (J.-H. Hwang), hyoungchul@hongik.ac.kr (H. Kim)

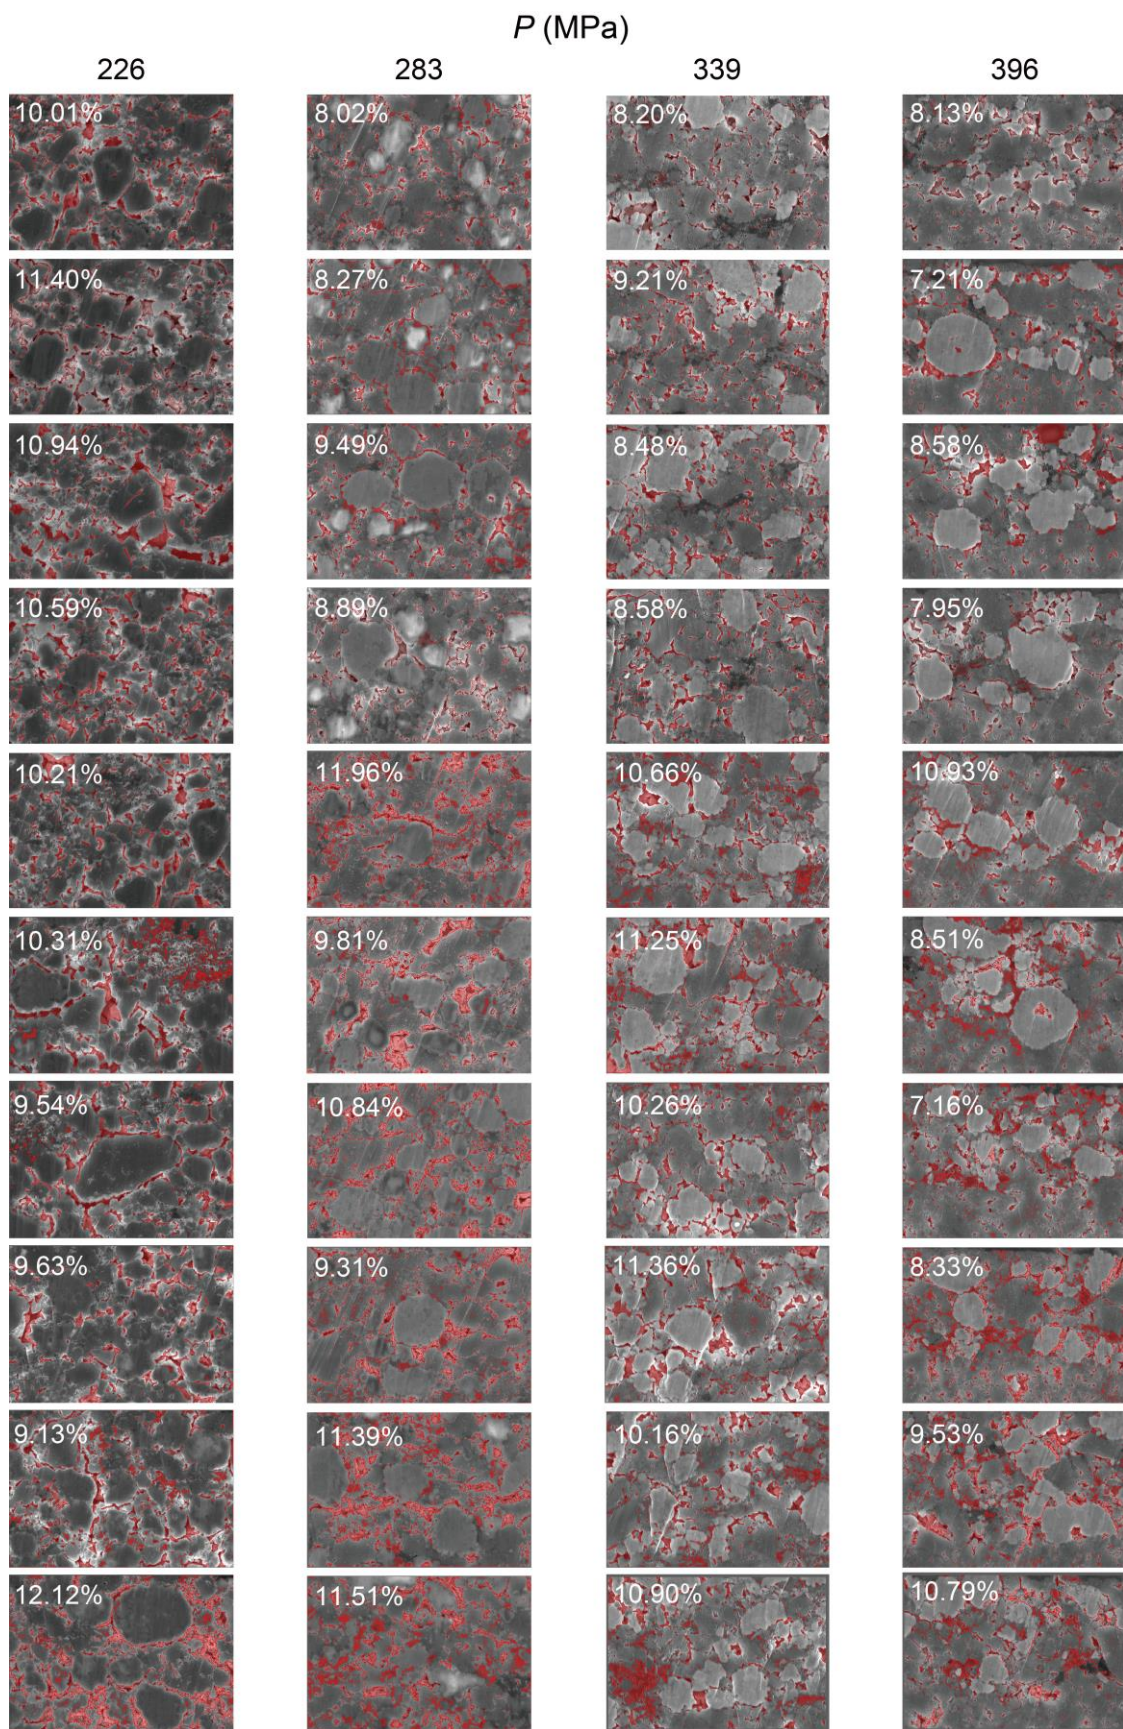

**Fig. S1.** Pore analysis of the as-fabricated composite cathode of free-to-uniaxial pressed cells (FUPCs). The graph illustrates porosity as a function of pressure ( $P$ ), with the red colour indicating pore regions.

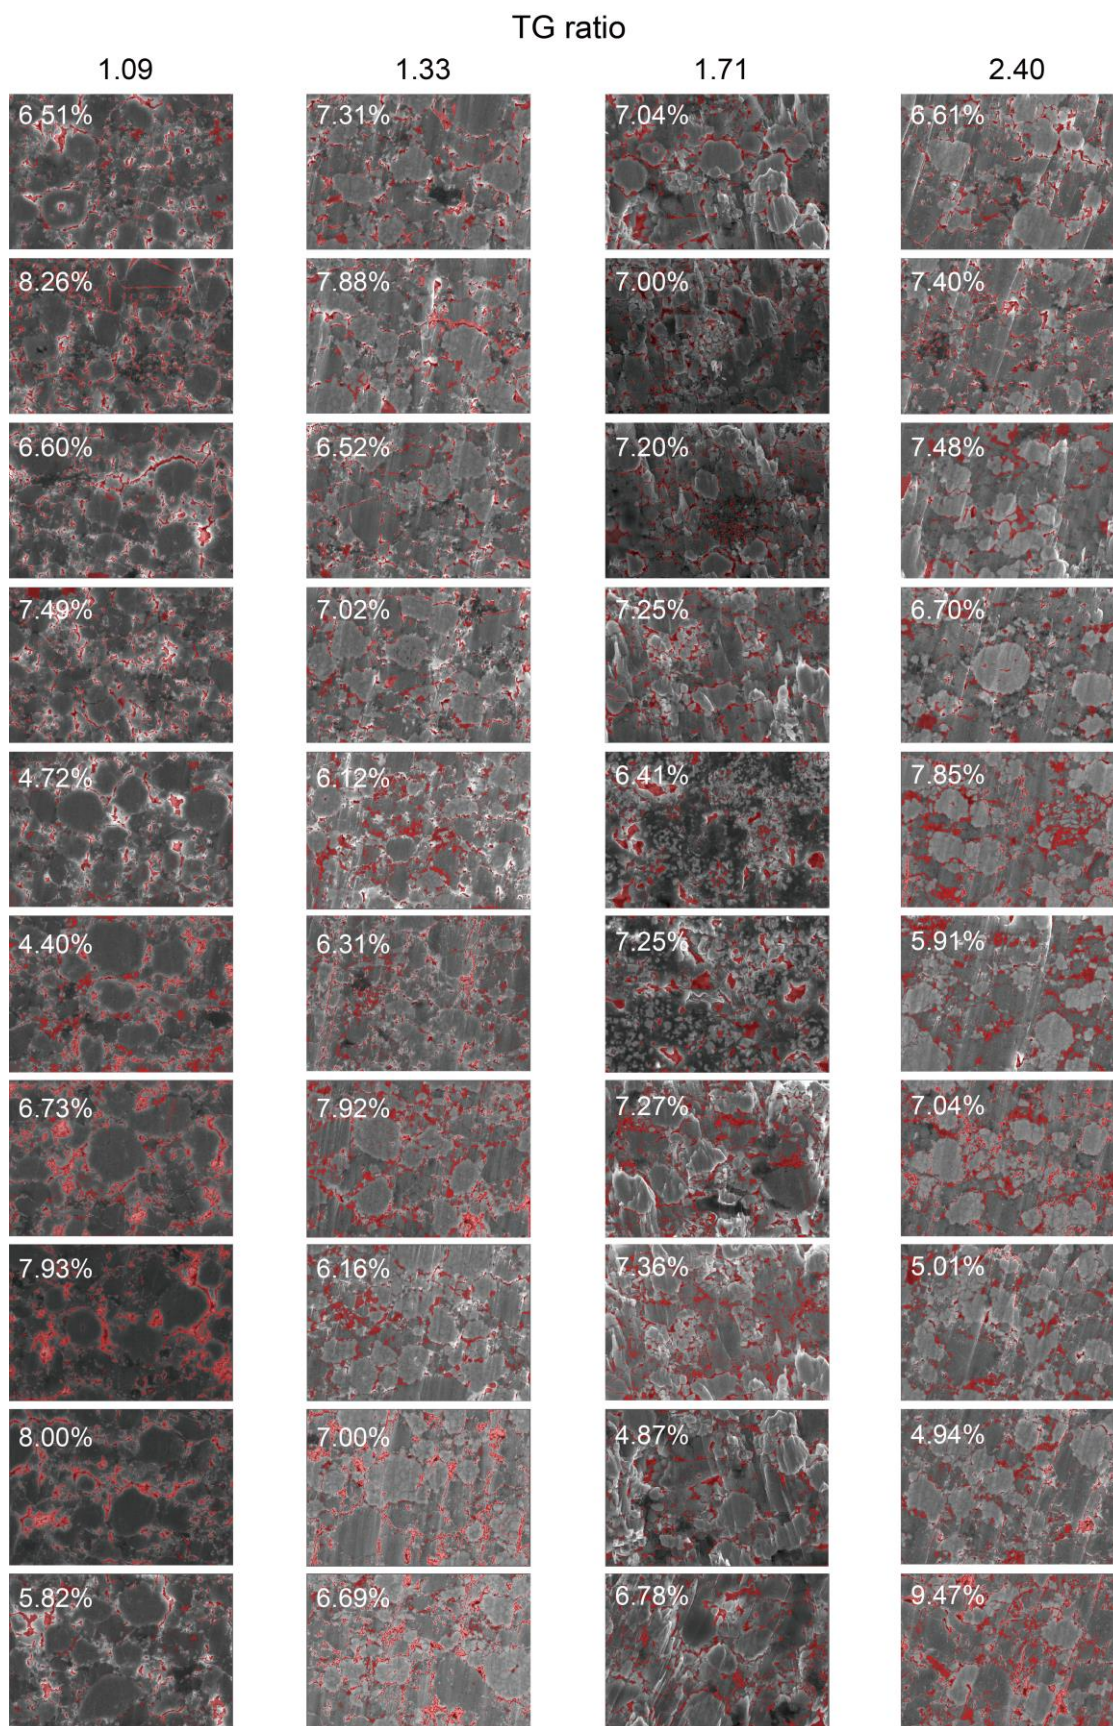

**Fig. S2.** Pore analysis of the as-fabricated composite cathode of roll-to-uniaxial pressed cells (RUPCs). The graph illustrates porosity as a function of thickness-to-gap (TG) ratio, with the red colour indicating pore regions.

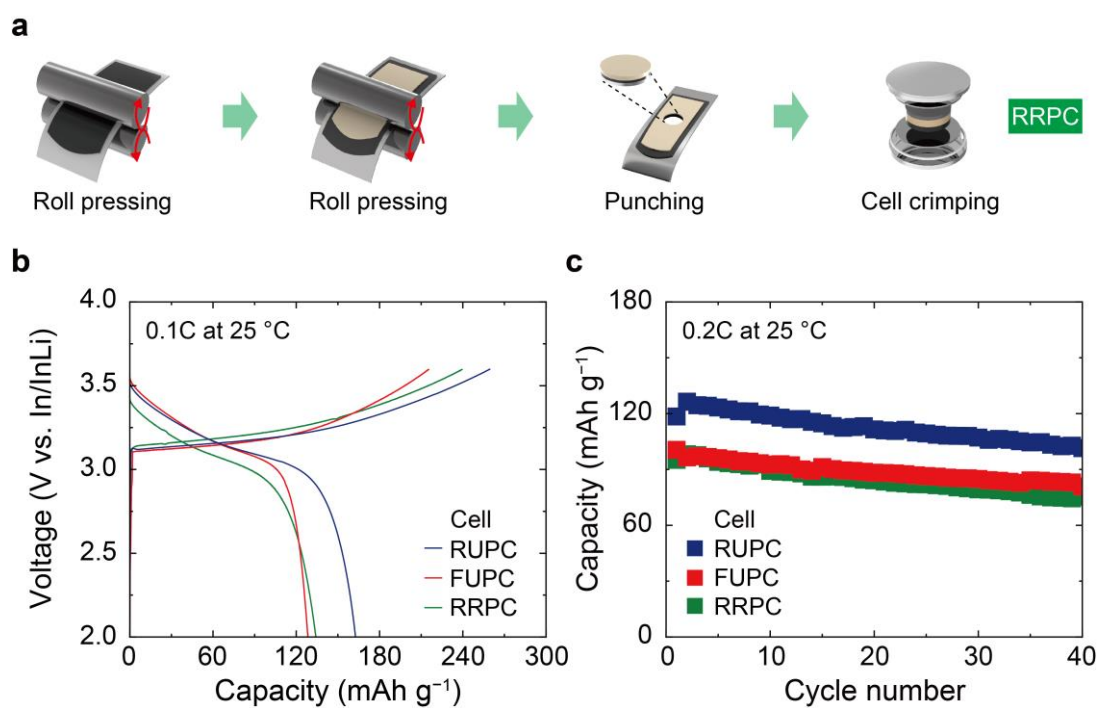

**Fig. S3.** Fabrication process and electrochemical performance of a reference roll-to-roll pressed cells (RRPC). (a) Depiction of cell fabrication processes using roll-to-roll pressing techniques. (b) Initial specific charge-discharge curves of the various cell types (RUPC, FUPC, and RRPC) at 0.1C. (c) Specific discharge capacities of the various cell types over 40 cycles at 0.2C.

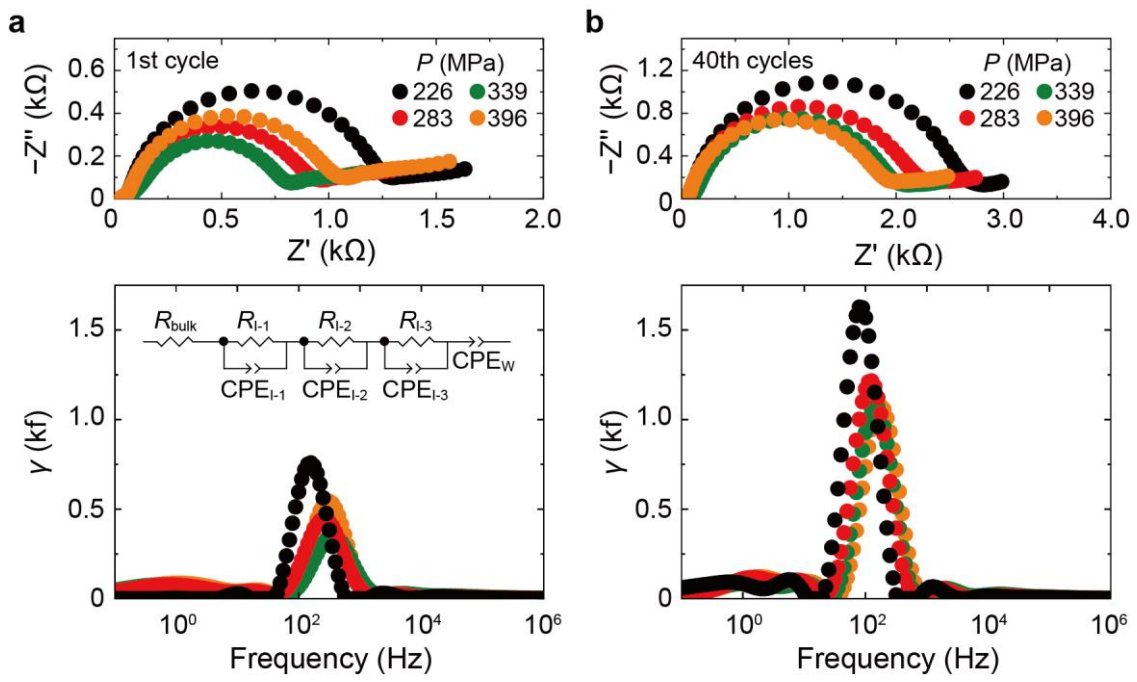

**Fig. S4.** Electrochemical impedance spectroscopy (EIS) analysis of FUPCs. Nyquist plot and distribution of relaxation times (DRT) curves for the FUPCs at (a) 1 cycle and (b) 40 cycles.

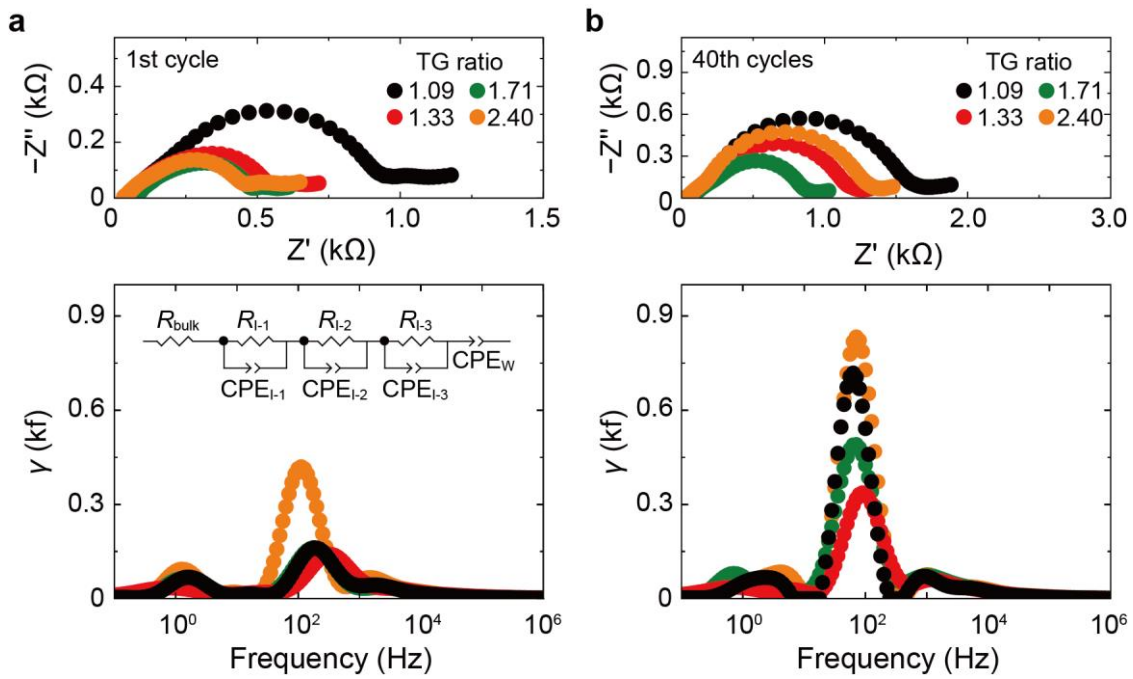

**Fig. S5.** EIS analysis of RUPCs. Nyquist plot and DRT curves for the RUPCs at (a) 1 cycle and (b) 40 cycles.

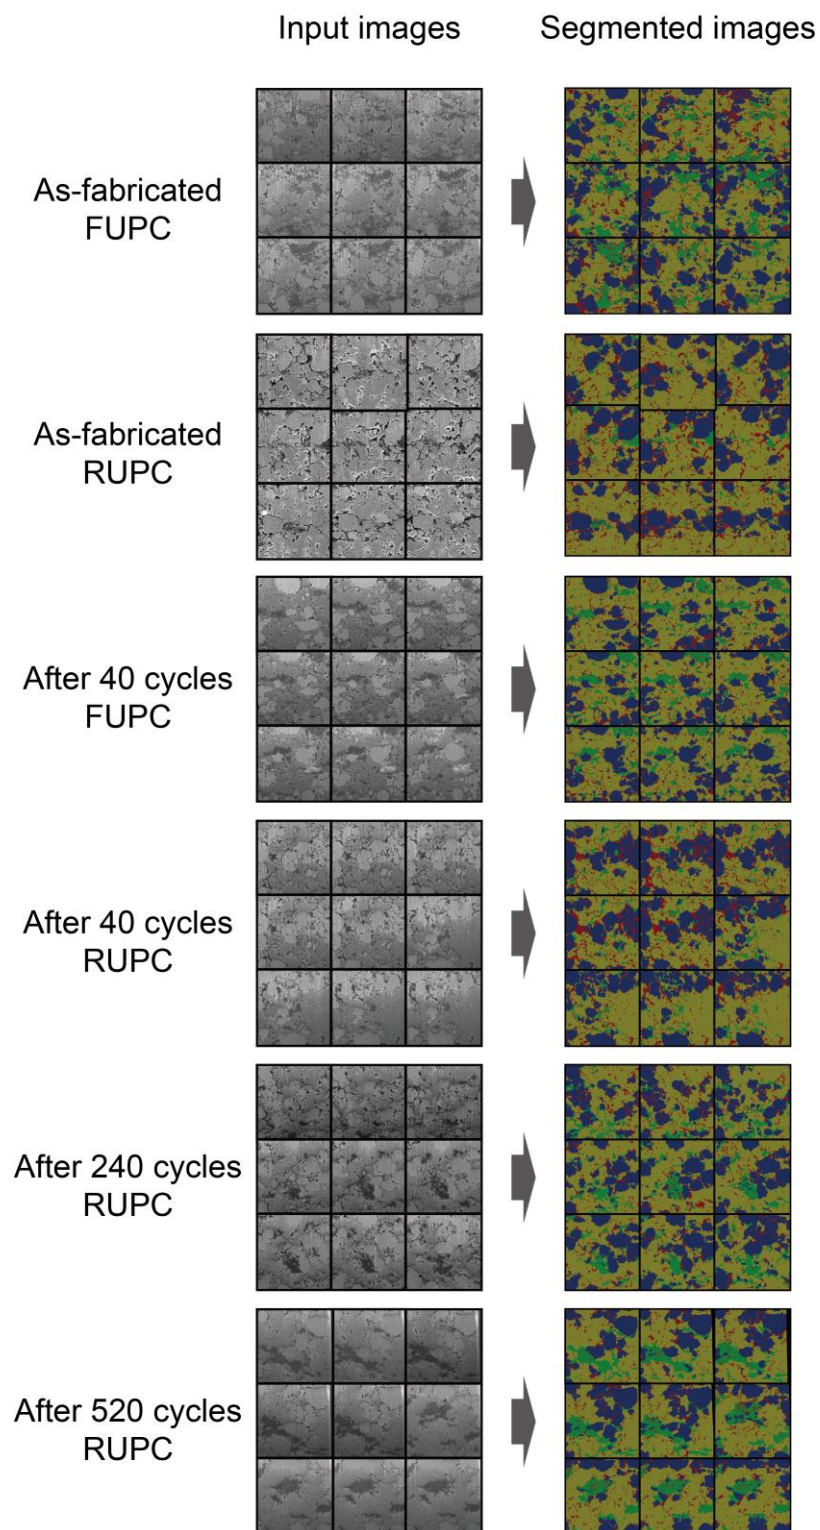

**Fig. S6.** Input and segmented images included the as-fabricated and after cycle states of FUPCs and RUPCs, and after a long-cycling test of RUPCs.

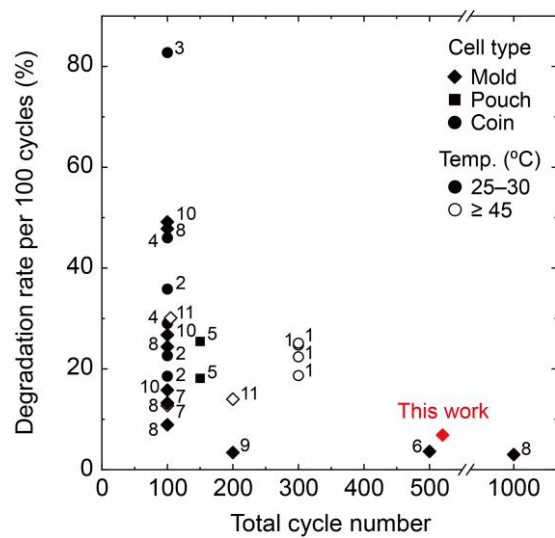

**Fig. S7.** Comparison of the degradation rates in this work with those of previously reported cells [wet-cast and sulfide-based solid electrolytes (SEs)].<sup>1–11</sup> Open and solid symbols indicate cell-operating temperature of  $\geq 45$  °C and around room temperature (25–30 °C), respectively.



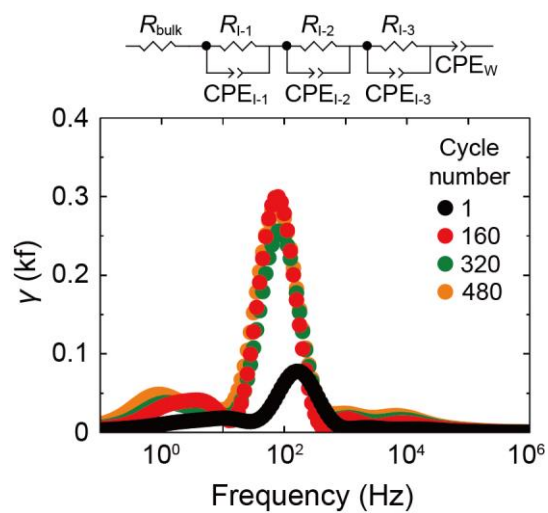

**Fig. S8.** DRT curves of RUPCs under a long-cycling test.

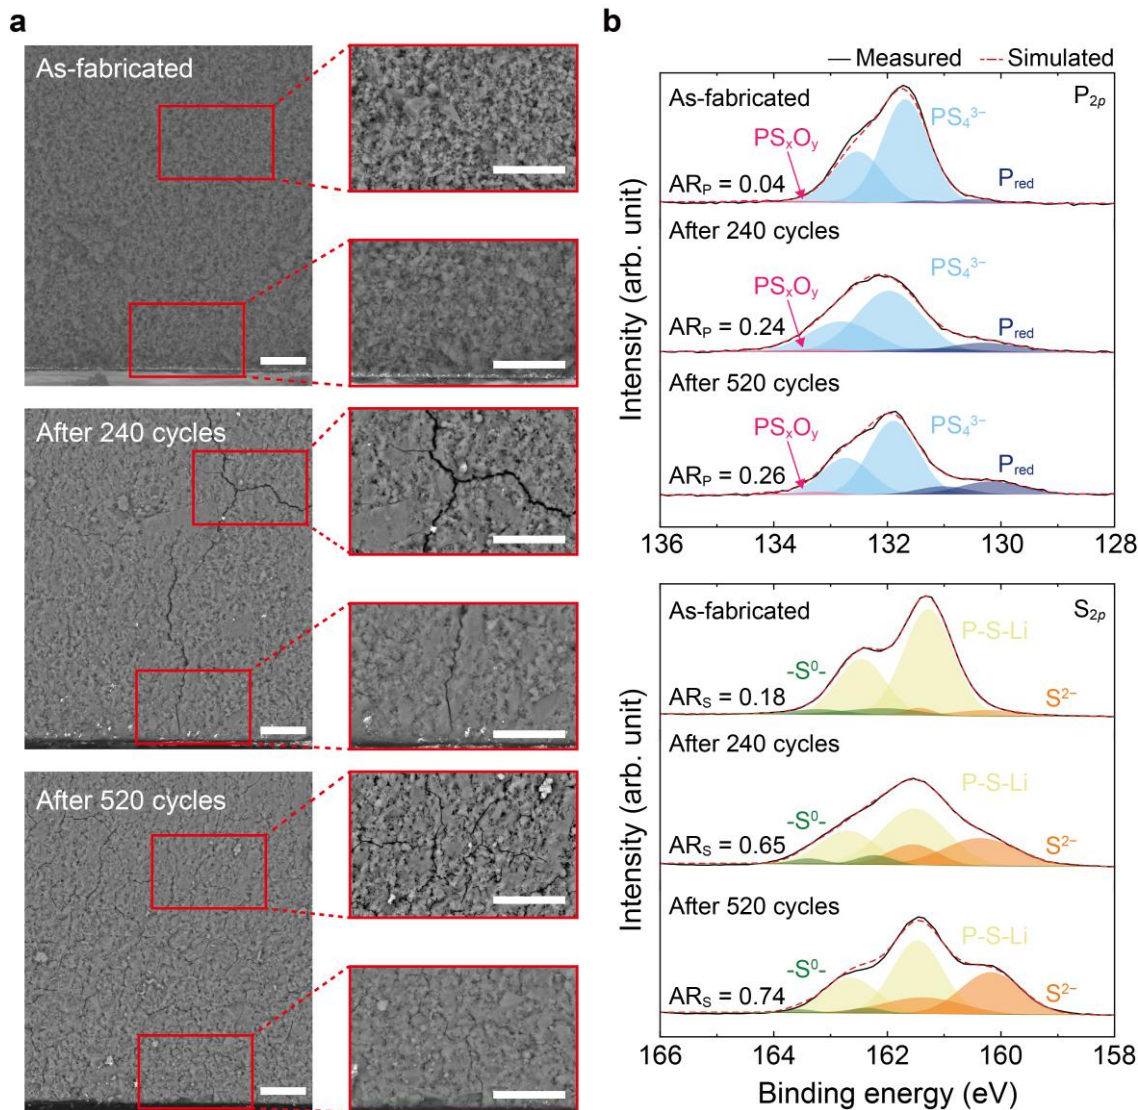

**Fig. S9.** Scanning electron microscope (SEM) images and X-ray photoelectron spectroscopy (XPS) results of RUPCs. (a) SEM images of the electrolyte layer and electrolyte-anode interface on RUPCs showing the microstructural evolution for as-fabricated (top), after 240 (middle), and 520 (bottom) cycles. All scale bars correspond to 5  $\mu\text{m}$ . (b) XPS spectra of  $P_{2p}$  and  $S_{2p}$  elements of the electrolyte-anode interface for as-fabricated, 240-, and 520-cycled conditions. The XPS results showed significant growth of peaks (*e.g.*,  $PS_xO_y$ ,  $P_{red}$ ,  $-S^0$ , and  $S^{2-}$ ) representing the decomposition products for each material. The area ratio ( $AR_i$ , where  $i$  is P or S) of decomposition reactions is given by the grown decomposition product to that of the pristine constituent in element  $i$ .

**Table S1.** Quantitative parameters including phase fraction, interconnectivity, and double-phase boundary (DPB) density. CAM and ECM indicate cathode active material and electronic conductive material.

| Material         | Phase fraction (%) |       |       |       | Interconnectivity |       |       |       | DPB density ( $\mu\text{m}^{-1}$ ) |        |         |        |
|------------------|--------------------|-------|-------|-------|-------------------|-------|-------|-------|------------------------------------|--------|---------|--------|
|                  | CAM                | SE    | ECM   | Pore  | CAM               | SE    | ECM   | Pore  | CAM-ECM                            | SE-ECM | CAM-ECM | Others |
| Uncycled FUPCs   | 27.41              | 49.98 | 11.87 | 10.74 | 0.178             | 0.407 | 0.136 | 0.280 | 0.563                              | 0.074  | 0.444   | 1.638  |
| Uncycled RUPCs   | 27.53              | 55.12 | 9.98  | 7.36  | 0.200             | 0.422 | 0.133 | 0.246 | 0.616                              | 0.062  | 0.414   | 1.252  |
| 40-cycled FUPCs  | 27.48              | 56.87 | 3.63  | 12.02 | 0.153             | 0.444 | 0.067 | 0.336 | 0.394                              | 0.026  | 0.206   | 1.645  |
| 40-cycled RUPCs  | 31.90              | 52.25 | 4.24  | 11.58 | 0.191             | 0.436 | 0.083 | 0.290 | 0.469                              | 0.047  | 0.304   | 1.407  |
| 240-cycled RUPCs | 30.57              | 52.56 | 9.53  | 7.33  | 0.218             | 0.417 | 0.142 | 0.222 | 0.532                              | 0.116  | 0.462   | 1.021  |
| 520-cycled RUPCs | 26.74              | 52.38 | 12.69 | 6.66  | 0.192             | 0.384 | 0.168 | 0.257 | 0.330                              | 0.102  | 0.338   | 1.074  |

**Table S2.** Comparison of quantitative parameters with experimental values.

| Material           | Phase fraction (%) |       |       |
|--------------------|--------------------|-------|-------|
|                    | CAM                | SE    | ECM   |
| Experimental value | 35.76              | 58.87 | 5.36  |
| Uncycled FUPCs     | 30.68              | 55.99 | 13.33 |
| Uncycled RUPCs     | 29.70              | 59.50 | 10.80 |
| 40-cycled FUPCs    | 31.25              | 64.66 | 4.09  |
| 40-cycled RUPCs    | 36.09              | 59.16 | 4.75  |
| 240-cycled RUPCs   | 33.01              | 56.74 | 10.25 |
| 520-cycled RUPCs   | 29.08              | 57.08 | 13.83 |
| Average            | 31.64              | 58.86 | 9.51  |

**Table S3.** Comparison of the electrochemical performance and degradation rate in this work with that of previously reported papers (wet-cast and sulfide-based SEs).

| Ref.      | Cell type | Total cycle number | C-rate | Temp. (°C) | Initial Discharge capacity (mAh g <sup>-1</sup> ) | Final Discharge capacity (mAh g <sup>-1</sup> ) | Retention (%) | Degradation rate per 100 cycles (%) |
|-----------|-----------|--------------------|--------|------------|---------------------------------------------------|-------------------------------------------------|---------------|-------------------------------------|
| 1         | Coin      | 300                | 1C     | 60         | 67.28                                             | 29.60                                           | 44.00         | 18.67                               |
| 1         | Coin      | 300                | 1C     | 60         | 63.34                                             | 16.36                                           | 25.83         | 24.72                               |
| 1         | Coin      | 300                | 1C     | 60         | 60.00                                             | 19.70                                           | 32.83         | 22.39                               |
| 1         | Coin      | 300                | 1C     | 60         | 57.58                                             | 14.24                                           | 24.73         | 25.09                               |
| 2         | Coin      | 100                | 0.1C   | R.T.       | 127.50                                            | 81.82                                           | 64.17         | 35.83                               |
| 2         | Coin      | 100                | 0.1C   | R.T.       | 114.70                                            | 93.44                                           | 81.46         | 18.54                               |
| 2         | Coin      | 100                | 0.1C   | R.T.       | 136.30                                            | 105.50                                          | 77.40         | 22.60                               |
| 3         | Coin      | 100                | 0.02C  | 25         | 124.18                                            | 21.43                                           | 17.26         | 82.74                               |
| 4         | Coin      | 100                | 0.02C  | 30         | 130.00                                            | 92.30                                           | 71.00         | 29.00                               |
| 4         | Coin      | 100                | 0.05C  | 30         | 96.08                                             | 51.88                                           | 54.00         | 46.00                               |
| 5         | Pouch     | 150                | 0.2C   | 30         | 153.00                                            | 111.39                                          | 72.80         | 18.13                               |
| 5         | Pouch     | 150                | 0.2C   | 30         | 121.00                                            | 74.78                                           | 61.80         | 25.47                               |
| 6         | Mold      | 500                | 0.5C   | 25         | 180.22                                            | 129.00                                          | 71.58         | 3.62                                |
| 7         | Mold      | 100                | 0.5C   | 25         | 61.00                                             | 52.92                                           | 86.75         | 13.25                               |
| 7         | Mold      | 100                | 0.5C   | 60         | 120.17                                            | 104.88                                          | 87.28         | 12.72                               |
| 8         | Mold      | 100                | 0.64C  | 25         | 162.35                                            | 147.90                                          | 91.10         | 8.90                                |
| 8         | Mold      | 100                | 0.64C  | 25         | 154.23                                            | 116.60                                          | 75.60         | 24.40                               |
| 8         | Mold      | 100                | 0.64C  | 25         | 134.68                                            | 116.90                                          | 86.80         | 13.20                               |
| 8         | Mold      | 100                | 0.64C  | 25         | 130.08                                            | 67.90                                           | 52.20         | 47.80                               |
| 8         | Mold      | 1000               | 0.64C  | 25         | 146.61                                            | 102.72                                          | 70.06         | 2.99                                |
| 9         | Mold      | 200                | 0.5C   | 30         | 160.00                                            | 149.12                                          | 93.20         | 3.40                                |
| 10        | Mold      | 100                | 0.2C   | 25         | 150.80                                            | 76.67                                           | 50.84         | 49.16                               |
| 10        | Mold      | 100                | 0.2C   | 25         | 148.33                                            | 124.89                                          | 84.20         | 15.80                               |
| 10        | Mold      | 100                | 0.2C   | 25         | 142.20                                            | 104.17                                          | 73.26         | 26.74                               |
| 11        | Mold      | 200                | 0.5C   | 60         | 189.69                                            | 136.58                                          | 72.00         | 14.00                               |
| 11        | Mold      | 105                | 0.5C   | 60         | 180.90                                            | 123.71                                          | 68.39         | 30.11                               |
| This work | Mold      | 520                | 0.2C   | 25         | 149.32                                            | 95.96                                           | 64.26         | 6.87                                |

**Table S4.** Individual fitting component ( $R$ , CPE-T, CPE-P, and  $C$ ) values obtained from EIS curves by conventional fitting method of FUPCs after 1 and 40 cycles.

| Pressure (MPa)                                  | FUPCs after 1 cycle   |           |           |            |
|-------------------------------------------------|-----------------------|-----------|-----------|------------|
|                                                 | 226                   | 283       | 339       | 396        |
| $R_{\text{bulk}}$ ( $\Omega$ )                  | 40.51                 | 35.02     | 55.55     | 39.82      |
| $R_{\text{I-1}}$ ( $\Omega$ )                   | 33.4                  | 43.06     | 76.25     | 34.44      |
| CPE-T <sub>I-1</sub> ( $\text{Fs}^{\alpha-1}$ ) | 1.3882E-5             | 2.3473E-5 | 2.1577E-5 | 2.4211E-5  |
| CPE-P <sub>I-1</sub> ( $\alpha$ )               | 0.64735               | 0.56222   | 0.55027   | 0.576      |
| $C_{\text{I-1}}$ (F)                            | 2.12E-7               | 1.09E-7   | 1.15E-7   | 1.30E-7    |
| $R_{\text{I-2}}$ ( $\Omega$ )                   | 1136                  | 810.2     | 642       | 908.2      |
| CPE-T <sub>I-2</sub> ( $\text{Fs}^{\alpha-1}$ ) | 1.67E-6               | 2.1278E-6 | 2.0935E-6 | 1.3924E-6  |
| CPE-P <sub>I-2</sub> ( $\alpha$ )               | 0.911                 | 0.85994   | 0.85618   | 0.88255    |
| $C_{\text{I-2}}$ (F)                            | 9.04E-7               | 7.55E-7   | 6.89E-7   | 5.73E-7    |
| $R_{\text{I-3}}$ ( $\Omega$ )                   | 356.8                 | 385.1     | 407.3     | 430        |
| CPE-T <sub>I-3</sub> ( $\text{Fs}^{\alpha-1}$ ) | 1.13E-3               | 1.0739E-3 | 1.2183E-3 | 7.9396E-4  |
| CPE-P <sub>I-3</sub> ( $\alpha$ )               | 0.605                 | 0.57405   | 0.55508   | 0.5749     |
| $C_{\text{I-3}}$ (F)                            | 6.21E-4               | 5.58E-4   | 6.95E-4   | 3.59E-4    |
| Pressure (MPa)                                  | FUPCs after 40 cycles |           |           |            |
|                                                 | 226                   | 283       | 339       | 396        |
| $R_{\text{bulk}}$ ( $\Omega$ )                  | 45.86                 | 44.04     | 64.27     | 39.86      |
| $R_{\text{I-1}}$ ( $\Omega$ )                   | 43.82                 | 50.33     | 90.53     | 34.44      |
| CPE-T <sub>I-1</sub> ( $\text{Fs}^{\alpha-1}$ ) | 2.5197E-5             | 1.2598E-5 | 1.3091E-5 | 2.4074 E-5 |
| CPE-P <sub>I-1</sub> ( $\alpha$ )               | 0.56901               | 0.62084   | 0.59557   | 0.5829     |
| $C_{\text{I-1}}$ (F)                            | 1.45E-7               | 1.40E-7   | 1.35E-7   | 1.50E-7    |
| $R_{\text{I-2}}$ ( $\Omega$ )                   | 2459                  | 2016      | 1726      | 1713       |
| CPE-T <sub>I-2</sub> ( $\text{Fs}^{\alpha-1}$ ) | 1.372E-6              | 1.3933E-6 | 1.314E-6  | 1.0964E-6  |
| CPE-P <sub>I-2</sub> ( $\alpha$ )               | 0.90904               | 0.88565   | 0.89398   | 0.89515    |
| $C_{\text{I-2}}$ (F)                            | 7.76E-7               | 6.53E-7   | 6.38E-7   | 5.26E-7    |
| $R_{\text{I-3}}$ ( $\Omega$ )                   | 471.8                 | 418.9     | 427.6     | 461.7      |
| CPE-T <sub>I-3</sub> ( $\text{Fs}^{\alpha-1}$ ) | 1.1522E-3             | 5.045E-4  | 6.9294E-4 | 4.1648E-4  |
| CPE-P <sub>I-3</sub> ( $\alpha$ )               | 0.54421               | 0.66839   | 0.57069   | 0.64856    |
| $C_{\text{I-3}}$ (F)                            | 6.92E-4               | 2.33E-4   | 2.78E-4   | 1.70E-4    |

**Table S5.** Individual fitting component values obtained from EIS curves by conventional fitting method of RUPCs after 1 and 40 cycles

| TG ratio                                           | RUPCs after 1 cycle   |          |          |          |
|----------------------------------------------------|-----------------------|----------|----------|----------|
|                                                    | 1.09                  | 1.33     | 1.71     | 2.40     |
| $R_{\text{bulk}} (\Omega)$                         | 34.64                 | 65.71    | 43.09    | 47.87    |
| $R_{\text{I-1}} (\Omega)$                          | 197.5                 | 201.7    | 199.6    | 200.4    |
| $\text{CPE-T}_{\text{I-1}} (\text{Fs}^{\alpha-1})$ | 2.98E-5               | 6.37E-5  | 2.10E-5  | 1.55E-5  |
| $\text{CPE-P}_{\text{I-1}} (\alpha)$               | 0.58904               | 0.50136  | 0.61899  | 0.63206  |
| $C_{\text{I-1}} (\text{F})$                        | 8.30E-07              | 8.37E-07 | 7.22E-07 | 5.36E-07 |
| $R_{\text{I-2}} (\Omega)$                          | 228.9                 | 219.1    | 310.8    | 677.8    |
| $\text{CPE-T}_{\text{I-2}} (\text{Fs}^{\alpha-1})$ | 8.72E-6               | 7.47E-6  | 9.30E-6  | 4.50E-6  |
| $\text{CPE-P}_{\text{I-2}} (\alpha)$               | 0.8847                | 0.84479  | 0.83328  | 0.88516  |
| $C_{\text{I-2}} (\text{F})$                        | 3.88E-06              | 2.30E-06 | 2.89E-06 | 2.12E-06 |
| $R_{\text{I-3}} (\Omega)$                          | 126.1                 | 119.3    | 109.5    | 151      |
| $\text{CPE-T}_{\text{I-3}} (\text{Fs}^{\alpha-1})$ | 1.11E-3               | 2.94E-3  | 1.48E-3  | 1.03E-3  |
| $\text{CPE-P}_{\text{I-3}} (\alpha)$               | 0.84937               | 0.66914  | 0.86853  | 0.88648  |
| $C_{\text{I-3}} (\text{F})$                        | 7.87E-04              | 1.75E-03 | 1.12E-03 | 8.08E-04 |
| TG ratio                                           | RUPCs after 40 cycles |          |          |          |
|                                                    | 1.09                  | 1.33     | 1.71     | 2.40     |
| $R_{\text{bulk}} (\Omega)$                         | 39.27                 | 65.65    | 51.1     | 55.85    |
| $R_{\text{I-1}} (\Omega)$                          | 198.9                 | 212.5    | 205.7    | 202.9    |
| $\text{CPE-T}_{\text{I-1}} (\text{Fs}^{\alpha-1})$ | 1.85E-5               | 2.19E-5  | 1.34E-5  | 1.56E-5  |
| $\text{CPE-P}_{\text{I-1}} (\alpha)$               | 0.61077               | 0.59188  | 0.646    | 0.61142  |
| $C_{\text{I-1}} (\text{F})$                        | 5.19E-7               | 5.38E-7  | 5.31E-7  | 4.02E-7  |
| $R_{\text{I-2}} (\Omega)$                          | 1005                  | 572.9    | 910.1    | 1257     |
| $\text{CPE-T}_{\text{I-2}} (\text{Fs}^{\alpha-1})$ | 3.94E-6               | 7.18E-6  | 6.32E-6  | 3.12E-6  |
| $\text{CPE-P}_{\text{I-2}} (\alpha)$               | 0.92525               | 0.86795  | 0.853    | 0.90741  |
| $C_{\text{I-2}} (\text{F})$                        | 2.52E-6               | 3.11E-6  | 2.61E-6  | 1.77E-6  |
| $R_{\text{I-3}} (\Omega)$                          | 147.4                 | 132.2    | 124.9    | 188.6    |
| $\text{CPE-T}_{\text{I-3}} (\text{Fs}^{\alpha-1})$ | 8.12E-4               | 2.89E-3  | 2.09E-3  | 7.41E-4  |
| $\text{CPE-P}_{\text{I-3}} (\alpha)$               | 0.83444               | 0.64732  | 0.891    | 0.75471  |
| $C_{\text{I-3}} (\text{F})$                        | 5.33E-4               | 1.71E-3  | 1.77E-3  | 3.91E-4  |

**Table S6.** Individual fitting component values obtained from EIS curves by conventional fitting method of RUPCs under a long-cycling test.

| Cycle number                                       | RUPCs under a long-cycling test |         |         |         |
|----------------------------------------------------|---------------------------------|---------|---------|---------|
|                                                    | 1                               | 160     | 320     | 480     |
| $R_{\text{bulk}} (\Omega)$                         | 30.23                           | 94.84   | 144.3   | 193.4   |
| $R_{\text{I-1}} (\Omega)$                          | 12.54                           | 37.97   | 50.08   | 65.71   |
| $\text{CPE-T}_{\text{I-1}} (\text{Fs}^{\alpha-1})$ | 3.31E-5                         | 1.86E-5 | 1.21E-5 | 1.07E-5 |
| $\text{CPE-P}_{\text{I-1}} (\alpha)$               | 0.6904                          | 0.66816 | 0.68598 | 0.6823  |
| $C_{\text{I-1}} (\text{F})$                        | 1.01E-6                         | 5.06E-7 | 4.09E-7 | 3.62E-7 |
| $R_{\text{I-2}} (\Omega)$                          | 139.2                           | 518.3   | 508.7   | 608.4   |
| $\text{CPE-T}_{\text{I-2}} (\text{Fs}^{\alpha-1})$ | 1.92E-5                         | 8.75E-6 | 1.03E-5 | 1.03E-5 |
| $\text{CPE-P}_{\text{I-2}} (\alpha)$               | 0.85154                         | 0.8735  | 0.83795 | 0.82279 |
| $C_{\text{I-2}} (\text{F})$                        | 6.84E-6                         | 4.00E-6 | 3.72E-6 | 3.45E-6 |
| $R_{\text{I-3}} (\Omega)$                          | 86.16                           | 125.8   | 118.3   | 151.5   |
| $\text{CPE-T}_{\text{I-3}} (\text{Fs}^{\alpha-1})$ | 1.67E-3                         | 1.36E-3 | 1.96E-3 | 1.94E-3 |
| $\text{CPE-P}_{\text{I-3}} (\alpha)$               | 0.54071                         | 0.69945 | 0.70367 | 0.69958 |
| $C_{\text{I-3}} (\text{F})$                        | 3.21E-4                         | 6.39E-4 | 1.06E-3 | 1.15E-3 |



**Table S7.** Detailed Resistance values obtained from DRT method in FUPCs and RUPCs.

| Pressure (MPa)             | FUPCs after 1 cycle             |         |         |         |
|----------------------------|---------------------------------|---------|---------|---------|
|                            | 226                             | 283     | 339     | 396     |
| $R_{\text{bulk}} (\Omega)$ | 40.51                           | 35.02   | 55.55   | 39.82   |
| $R_{\text{I-1}} (\Omega)$  | 27.85                           | 335.39  | 364.79  | 436.63  |
| $R_{\text{I-2}} (\Omega)$  | 1463.27                         | 728.36  | 564.23  | 904.87  |
| $R_{\text{I-3}} (\Omega)$  | 35.08                           | 174.61  | 196.54  | 31.14   |
| Pressure (MPa)             | FUPCs after 40 cycles           |         |         |         |
|                            | 226                             | 283     | 339     | 396     |
| $R_{\text{bulk}} (\Omega)$ | 45.86                           | 44.04   | 64.27   | 39.86   |
| $R_{\text{I-1}} (\Omega)$  | 463.29                          | 443.91  | 440.31  | 464.23  |
| $R_{\text{I-2}} (\Omega)$  | 2454.30                         | 1982.69 | 1737.72 | 1698.35 |
| $R_{\text{I-3}} (\Omega)$  | 57.03                           | 58.63   | 66.10   | 46.56   |
| TG ratio                   | RUPCs after 1 cycle             |         |         |         |
|                            | 1.09                            | 1.33    | 1.71    | 2.40    |
| $R_{\text{bulk}} (\Omega)$ | 34.64                           | 65.71   | 43.09   | 47.87   |
| $R_{\text{I-1}} (\Omega)$  | 123.76                          | 112.61  | 119.40  | 161.96  |
| $R_{\text{I-2}} (\Omega)$  | 202.39                          | 189.81  | 252.80  | 698.12  |
| $R_{\text{I-3}} (\Omega)$  | 226.35                          | 237.68  | 247.70  | 169.12  |
| TG ratio                   | RUPCs after 40 cycles           |         |         |         |
|                            | 1.09                            | 1.33    | 1.71    | 2.40    |
| $R_{\text{bulk}} (\Omega)$ | 39.27                           | 65.65   | 51.1    | 55.85   |
| $R_{\text{I-1}} (\Omega)$  | 138.31                          | 156.69  | 144.41  | 187.46  |
| $R_{\text{I-2}} (\Omega)$  | 1063.01                         | 555.49  | 877.16  | 1291.85 |
| $R_{\text{I-3}} (\Omega)$  | 149.98                          | 205.42  | 219.13  | 169.19  |
| Cycle number               | RUPCs under a long-cycling test |         |         |         |
|                            | 1                               | 160     | 320     | 480     |
| $R_{\text{bulk}} (\Omega)$ | 30.23                           | 94.84   | 144.3   | 193.4   |
| $R_{\text{I-1}} (\Omega)$  | 91.89                           | 129.46  | 137.55  | 179.41  |
| $R_{\text{I-2}} (\Omega)$  | 124.17                          | 497.92  | 458.97  | 536.27  |
| $R_{\text{I-3}} (\Omega)$  | 21.84                           | 54.68   | 80.56   | 109.93  |

## References

1. J. Zhang, H. Zhong, C. Zheng, Y. Xia, C. Liang, H. Huang, Y. Gan, X. Tao, and W. Zhang, *J. Power Sources*, 2018, **391**, 73–79.
2. Q. Ye, X. Li, W. Zhang, Y. Xia, X. He, H. Huang, Y. Gan, X. Xia, and J. Zhang, *ACS Appl. Mater. Interfaces*, 2023, **15**, 18878–18888.
3. S. Choi, M. Jeon, J. Ahn, W. D. Jung, S. M. Choi, J. -S. Kim, J. Lim, Y. -J. Jang, H. -G. Jung, J. -H. Lee, B. -I. Sang, and H. Kim, *ACS Appl. Mater. Interfaces*, 2018, **10**, 23740–23747.
4. Y. Xia, J. Li, Z. Xiao, X. Zhou, J. Zhang, H. Huang, Y. Gan, X. He, and W. Zhang, *ACS Appl. Mater. Interfaces*, 2022, **14**, 33361–33369.
5. T. Y. Kwon, K. T. Kim, D. Y. Oh, Y. B. Song, S. Jun, and Y. S. Jung, *Energy Stor. Mater.*, 2022, **49**, 219–226.
6. S. Jing, H. Shen, Y. Huang, W. Kuang, Z. Zhang, S. Liu, S. Yin, Y. Lai, and F. Liu, *Adv. Funct. Mater.*, 2023, **33**, 2214274.
7. D. Lee, Y. Shim, Y. Kim, G. Kwon, S. H. Choi, K. Kim, and D. -J. Yoo, *Nat. Commun.*, 2024, **15**, 4763.
8. J. Gao, J. Hao, Y. Gao, X. Sun, Y. Zhang, D. Song, Q. Zhao, F. Zhao, W. Si, K. Wang, T. Ohsaka, F. Matsumoto, J. Wu, and H. Xie, *eTransportation*, 2023, **17**, 100252.
9. K. T. Kim, T. Y. Kwon, Y. B. Song, S. -M. Kim, S. C. Byun, H. -S. Min, S. H. Kim, and Y. S. Jung, *J. Chem. Eng.*, 2022, **450**, 138047.
10. Y. -J. Lee, S. -B. Hong, and D. -W. Kim, *J. Ind. Eng. Chem.*, 2023, **122**, 341–348.
11. S. -B. Hong, Y. -R. Jang, Y. -C. Jung, W. Cho, and D. -W. Kim, *ACS Appl. Energy Mater.*, 2024, **7**, 5193–5201.
